# Supplementary material
Source: PubMed Central journal article supplement (PMC4753789)

Supplementary Figure 1. Shehata et al, 2014

A. GCH-G

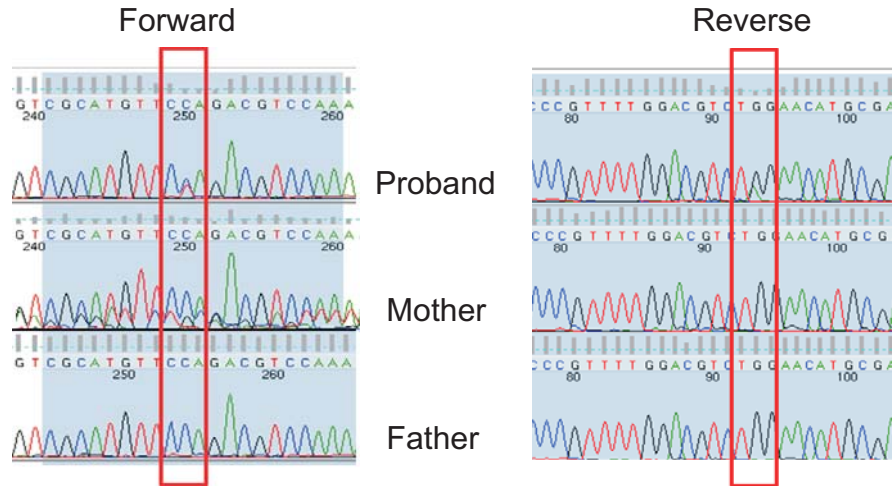

B. GCH-T

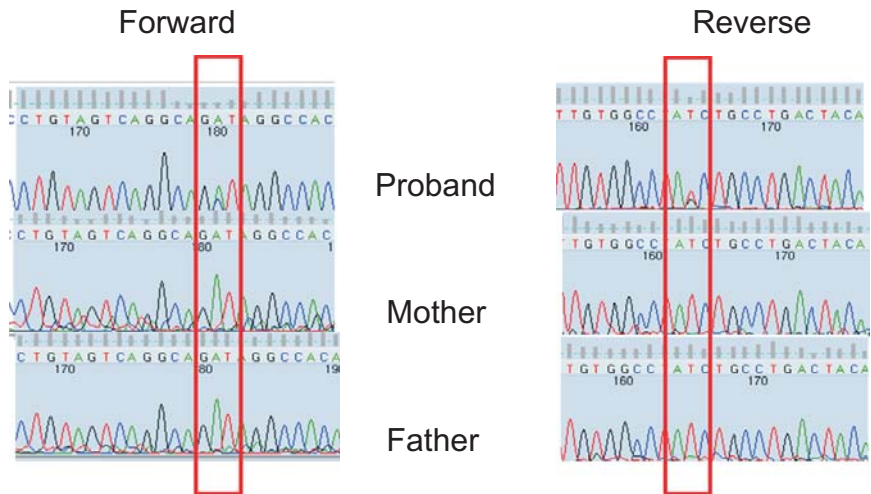

Supplementary Figure 2. Shehata et al, 2014

A

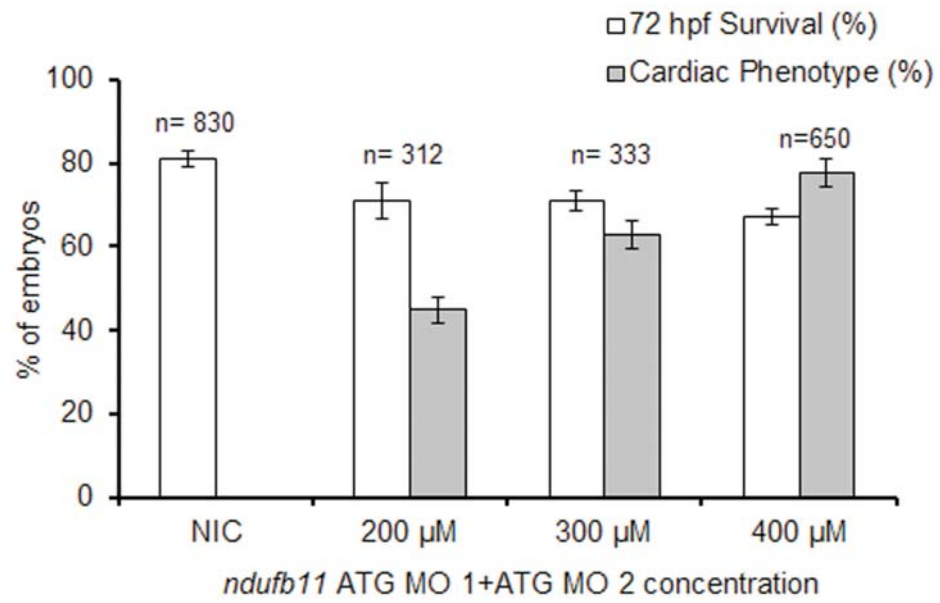

Supplementary Figure 3. Shehata et al, 2014

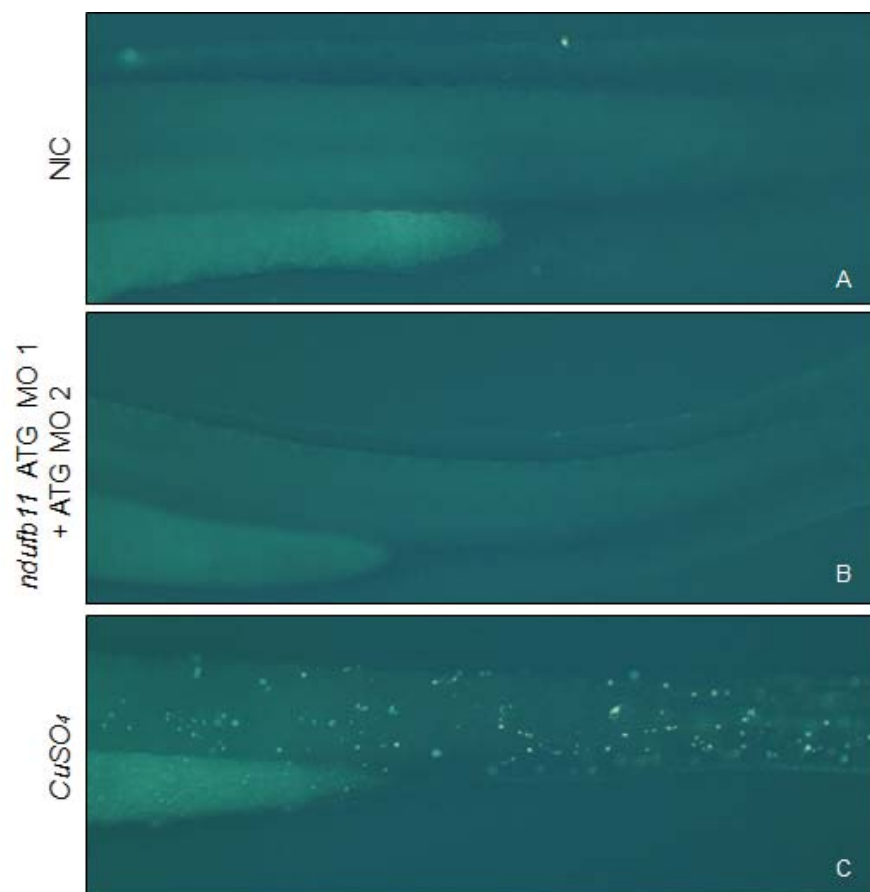

Supplement: NIHMS734425-supplement-Supplementary_Figures.pdf [file NIHMS734425-supplement-Supplementary_Figures.pdf]
